# Supplementary material for: Hexosylceramides are elevated in human, mouse and cellular Parkinson's disease and cause gene upregulations in neurons mimicking responses to pathogens
Source: Research Square preprint supplement (doi:10.21203/rs.3.rs-6633816/v1), 2025-08-01
Supplement: Supplementary file 1 [file aa7f7017fc22a2dd74cc19b7.pdf]

## Supplementary Tables and Figures to

### Hexosylceramides are elevated in human, mouse and cellular Parkinson's disease and cause gene upregulations in neurons mimicking responses to pathogens

Luisa Franck<sup>1</sup>, Lisa Hahnefeld<sup>1,2</sup>, Lucie Valek<sup>1</sup>, Katharina Klatt-Schreiner<sup>1</sup>, Annett Wilken-Schmitz<sup>1</sup>, Mohamad Wessam Alnouri<sup>3</sup>, Sandra Trautmann<sup>1,2</sup>, Marc-Philipp Weyer<sup>1</sup>, Dominique Thomas<sup>1,2</sup>, Robert Gurke<sup>1,2</sup>, Stefan Offermanns<sup>3</sup>, Gerd Geisslinger<sup>1,2</sup>, Irmgard Tegeder<sup>1</sup>

<sup>1</sup>Goethe University Frankfurt, Faculty of Medicine, Institute of Clinical Pharmacology, Theodor-Stern-Kai 7, 60590 Frankfurt am Main, Germany.

<sup>2</sup>Fraunhofer Institute for Translational Medicine and Pharmacology ITMP and Fraunhofer Cluster of Excellence for Immune Mediated Diseases CIMD, Theodor-Stern-Kai 7, 60596 Frankfurt am Main, Germany

<sup>3</sup>Max Planck Institute for Heart and Lung Research, Department of Pharmacology, Bad Nauheim, Germany

## Supplementary Tables

### Suppl. Table 1: Demographic data for plasma lipidomic analyses

Demographic data - Samples for plasma lipidomic analyses. Modified from Mov Disord. 2020 Oct;35(10):1822-1833. doi: 10.1002/mds.28186.

#### Demographic data

|                          | Healthy controls (HC) |      |               |      | Parkinson's Disease (PD) |      |               |      |
|--------------------------|-----------------------|------|---------------|------|--------------------------|------|---------------|------|
|                          | female (n = 25)       |      | male (n = 25) |      | female (n = 16)          |      | male (n = 34) |      |
|                          | Mean                  | SD   | Mean          | SD   | Mean                     | SD   | Mean          | SD   |
| Age (years)              | 60.56                 | 7.10 | 65.28         | 9.00 | 64.06                    | 8.64 | 68.15         | 7.75 |
| BMI                      | 26.51                 | 4.95 | 27.84         | 4.43 | 25.61                    | 4.68 | 26.61         | 3.93 |
| Disease Duration (years) |                       |      |               |      | 6.00                     | 5.55 | 8.85          | 7.48 |
| VAS Avg. pain            | 2.24                  | 2.18 | 0.95          | 1.80 | 3.89                     | 1.95 | 3.37          | 2.73 |

| Medication       |     | Healthy controls (HC) |         |     |           |         |     | Parkinson's Disease (PD) |         |     |           |         |     | Counts    |           |
|------------------|-----|-----------------------|---------|-----|-----------|---------|-----|--------------------------|---------|-----|-----------|---------|-----|-----------|-----------|
|                  |     | female                |         |     | male      |         |     | female                   |         |     | male      |         |     | Sum<br>HC | Sum<br>PD |
|                  |     | Age Class             |         |     | Age Class |         |     | Age Class                |         |     | Age Class |         |     |           |           |
|                  |     | <= 60                 | 61 - 70 | 70+ | <= 60     | 61 - 70 | 70+ | <= 60                    | 61 - 70 | 70+ | <= 60     | 61 - 70 | 70+ |           |           |
| Levodopa         | no  | 13                    | 9       | 3   | 9         | 7       | 9   | 2                        | 0       | 1   | 2         | 1       | 4   | 50        | 10        |
| Carbidopa        | yes |                       |         |     |           |         |     | 4                        | 5       | 4   | 6         | 8       | 13  |           | 40        |
| DA agonists      | no  | 13                    | 9       | 3   | 9         | 7       | 9   | 2                        | 2       | 3   | 1         | 2       | 6   | 50        | 16        |
|                  | yes |                       |         |     |           |         |     | 4                        | 3       | 2   | 6         | 7       | 10  |           | 32        |
| Amantadin        | no  | 13                    | 9       | 3   | 9         | 7       | 9   | 6                        | 4       | 5   | 7         | 7       | 11  | 50        | 40        |
|                  | yes |                       |         |     |           |         |     | 0                        | 1       | 0   | 0         | 2       | 5   |           | 8         |
| MAOB Inhibitors  | no  | 13                    | 9       | 3   | 9         | 7       | 9   | 1                        | 4       | 2   | 4         | 5       | 9   | 50        | 25        |
|                  | yes |                       |         |     |           |         |     | 5                        | 1       | 3   | 3         | 4       | 7   |           | 23        |
| COMT Inhibitors  | no  | 13                    | 9       | 3   | 9         | 7       | 9   | 4                        | 4       | 5   | 5         | 6       | 10  | 50        | 34        |
|                  | yes |                       |         |     |           |         |     | 2                        | 1       | 0   | 2         | 3       | 6   |           | 14        |
| Anticholinergics | no  | 13                    | 9       | 3   | 9         | 7       | 9   | 6                        | 5       | 5   | 7         | 7       | 16  | 50        | 46        |
|                  | yes |                       |         |     |           |         |     | 0                        | 0       | 0   | 0         | 2       | 0   |           | 2         |
| HoehnYahr        | 0.0 | 13                    | 9       | 3   | 9         | 7       | 9   | 0                        | 0       | 0   | 0         | 1       | 0   | 50        | 1         |
|                  | 1.0 |                       |         |     |           |         |     | 2                        | 2       | 1   | 0         | 0       | 2   |           | 7         |
|                  | 2.0 |                       |         |     |           |         |     | 3                        | 0       | 1   | 3         | 2       | 4   |           | 13        |
|                  | 2.5 |                       |         |     |           |         |     | 0                        | 1       | 2   | 0         | 1       | 4   |           | 8         |
|                  | 3.0 |                       |         |     |           |         |     | 1                        | 2       | 1   | 4         | 3       | 4   |           | 15        |
|                  | 4.0 |                       |         |     |           |         |     | 0                        | 0       | 0   | 1         | 2       | 3   |           | 6         |
| Pain             | no  | 7                     | 3       | 1   | 7         | 6       | 6   | 0                        | 0       | 1   | 4         | 4       | 4   | 30        | 13        |
|                  | yes | 6                     | 6       | 2   | 2         | 1       | 3   | 6                        | 5       | 4   | 4         | 5       | 13  | 20        | 37        |
| Pain medication  | no  | 11                    | 6       | 1   | 7         | 4       | 4   | 3                        | 3       | 4   | 6         | 5       | 9   | 33        | 30        |
|                  | yes | 2                     | 3       | 2   | 2         | 2       | 5   | 2                        | 2       | 1   | 2         | 4       | 8   | 16        | 19        |

Suppl. Table 2: Demographic data of skin biopsy donor PD patients

| GR | Age | sex | Sample-Veh    | Sample-PIM    | HoehnYahr | Disease (years) | L-DOPA | DR-agonist | MAOB-I | COMT-I | NMDA | ACH | ApoMOR | DBS |
|----|-----|-----|---------------|---------------|-----------|-----------------|--------|------------|--------|--------|------|-----|--------|-----|
| PD | 61  | f   | PD_veh_f_JH   | PD_PIM_f_JH   | 1.5       | 1               | no     | no         | yes    | no     | no   | no  | no     | no  |
| PD | 55  | f   | PD_veh_f_KP   | PD_PIM_f_KP   | 1         |                 | no     | yes        | no     | no     | no   | no  | no     | no  |
| PD | 64  | m   | PD_veh_m_FB   | PD_PIM_m_FB   | 3         | 26              | yes    | yes        | no     | yes    | yes  | no  | yes    | no  |
| PD | 75  | m   | PD_veh_m_HJI  | PD_PIM_m_HJI  | 3         | 7               | yes    | no         | no     | no     | no   | no  | no     | no  |
| PD | 59  | f   | PD_veh_f_HS   | PD_PIM_f_HS   | 4         | 11              | yes    | no         | no     | yes    | no   | no  | no     | yes |
| PD | 56  | f   | PD_veh_f_EM   | PD_PIM_f_EM   | 1         | 3               | no     | yes        | yes    | no     | no   | no  | no     | no  |
| PD | 78  | m   | PD_veh_m_OH   | PD_PIM_m_OH   | 3         | 21              | yes    | yes        | no     | yes    | no   | no  | no     | yes |
| PD | 79  | m   | PD_veh_m_GRM  | PD_PIM_m_GRM  | 3         | 16              | yes    | no         | yes    | yes    | no   | no  | no     | no  |
| PD | 72  | m   | PD_veh_m_GS   | PD_PIM_m_GS   | 2         | 2               | no     | yes        | no     | no     | no   | yes | no     | no  |
| PD | 84  | m   | PD_veh_m_MG   | PD_PIM_m_MG   | 2         | 4               | yes    | yes        | no     | no     | no   | no  | no     | no  |
| PD | 58  | m   | PD_veh_m_TSCh | PD_PIM_m_TSCh | 3         | 10              | yes    | no         | no     | yes    | no   | no  | no     | yes |
| PD | 74  | m   | PD_veh_m_RK   | PD_PIM_m_RK   |           | 3               | no     | yes        | no     | no     | no   | no  | no     | no  |
| PD | 65  | m   | PD_veh_m_HJB  | PD_PIM_m_HJB  |           |                 | yes    | no         | no     | no     | no   | yes | no     | no  |

## Supplementary Figures

Suppl. Fig. 1

### Untargeted lipidomic screen

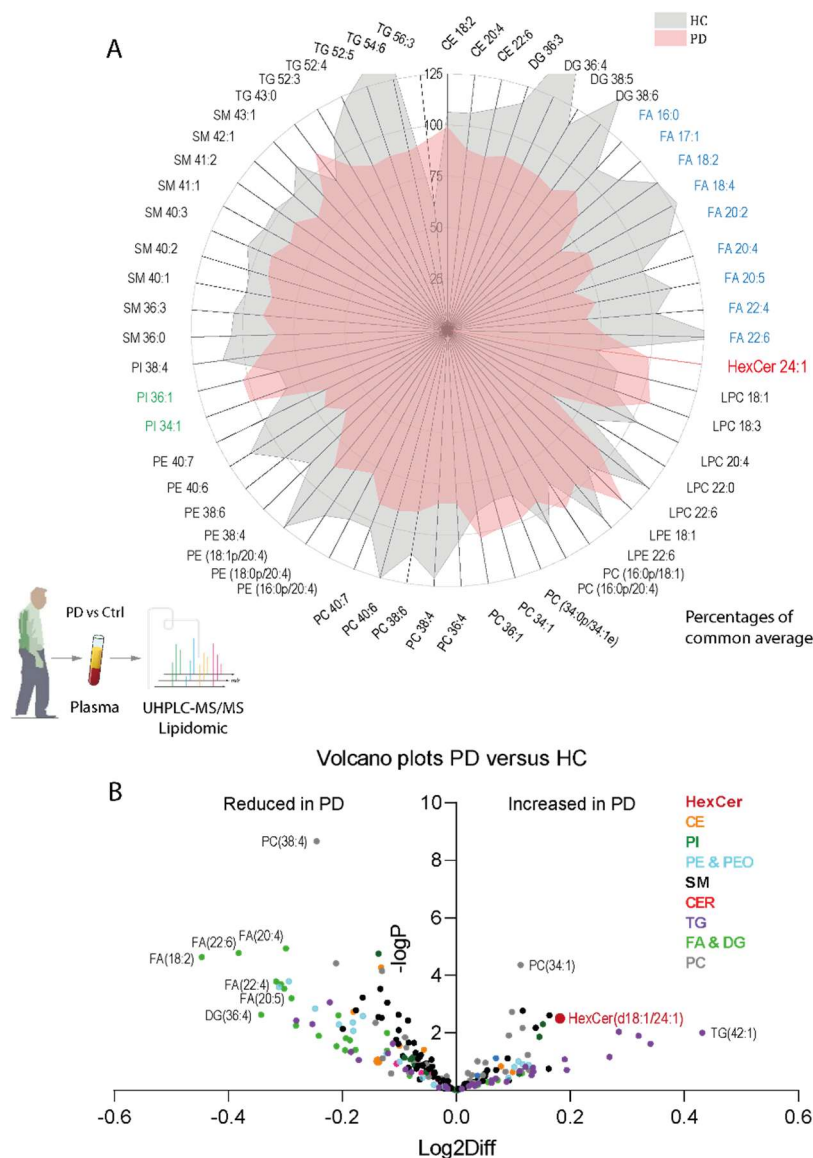

## Supplementary Figure S1

### Plasma lipidomic analyses in PD patients versus healthy controls (HC)

Parkinson's Disease (PD) patients (n = 16 female, 34 male) and healthy controls (HC) (n = 25 female, 25 male) were age matched 60-70+ years old at the time of blood sampling. Demographic details as in {Klatt-Schreiner, 2020 #415}.

**A:** The radial plots shows top down- and upregulated lipids in PD versus HC. Mass spectrometry area under the curve (AUC) were divided by the AUC of the internal standard (IS) (AUC/IS). Because lipid abundance varies over several orders of magnitude, AUC/IS values were transformed into percentages versus a common average for each lipid. The mean percentages per group are presented in the radial plot. For clarity, the plot shows no error bars.

**B:** Volcano plots show the Log2(fold change) on the x-axis versus the negative Log10 of the P-value of t-tests on the Y-axis. The lipid classes are colour coded.

Abbreviations: CAR, carnitines; CER, ceramides; CE, cholesterol ester; DG, diglycerides; FA, fatty acids; HexCer, hexosylceramides; LPC, lysophosphatidylcholines; LPE, lysophosphatidylethanolamines; LPG, lysophosphatidylglycerols; LPI, lysophosphatidylinositols; PC, phosphatidylcholines; PE, phosphatidylethanolamines; PD, phosphatidylglycerols; PI, phosphatidylinositols; SM, sphingomyelins; ST, sterols; TG, triglycerides; UbiQ, ubiquitin; -O ether bound.

Suppl. Fig. 2

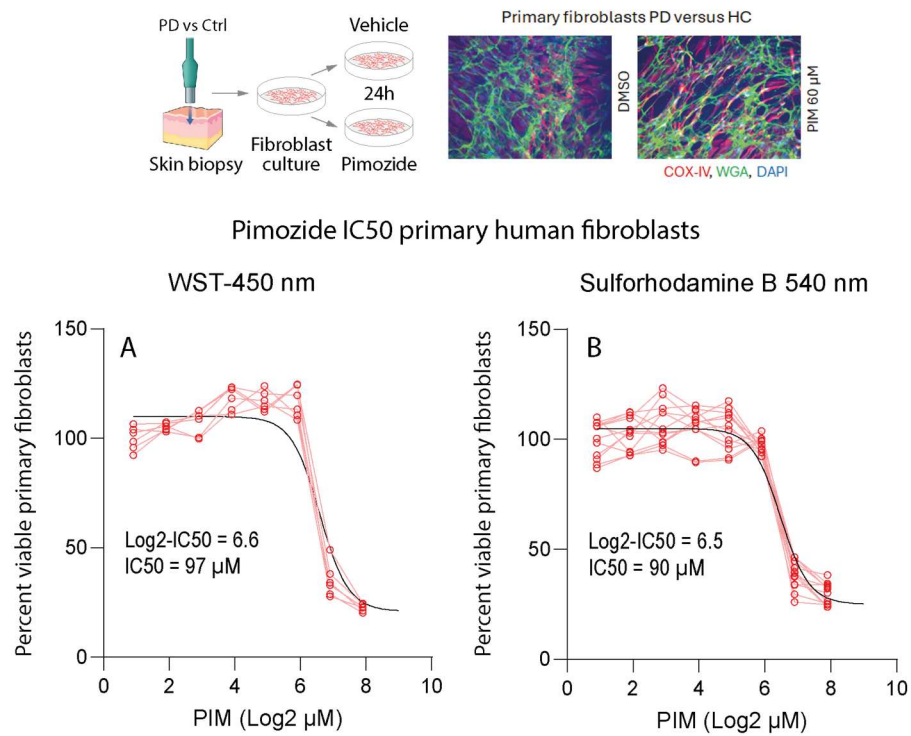

## Supplementary Figure S2

### Pimozide IC<sub>50</sub> in primary human fibroblasts

In a 96-well plate, PHF cultures were treated for 24h with pimozide at increasing log<sub>2</sub>-scaled eight concentrations in rows A-H. Viability was assessed at 24h using WST reagent and sulforhodamine B (SRB) assays. WST absorbance and SRB absorbance were transformed into percentage survival as compared to the average of vehicle treated cultures and plotted on the Y-axis versus the Log<sub>2</sub> pimozide concentration on the X-axis. Each scatter represents one culture. The red lines connect cultures in one column of the 96-well plate. Data were analysed using as standard sigmoidal inhibitory Emax model. The fit line is shown in black. The IC<sub>50</sub> of pimozide was 90-100  $\mu$ M.

Suppl. Fig. 3 Lipidomic analysis brain tissue top 70

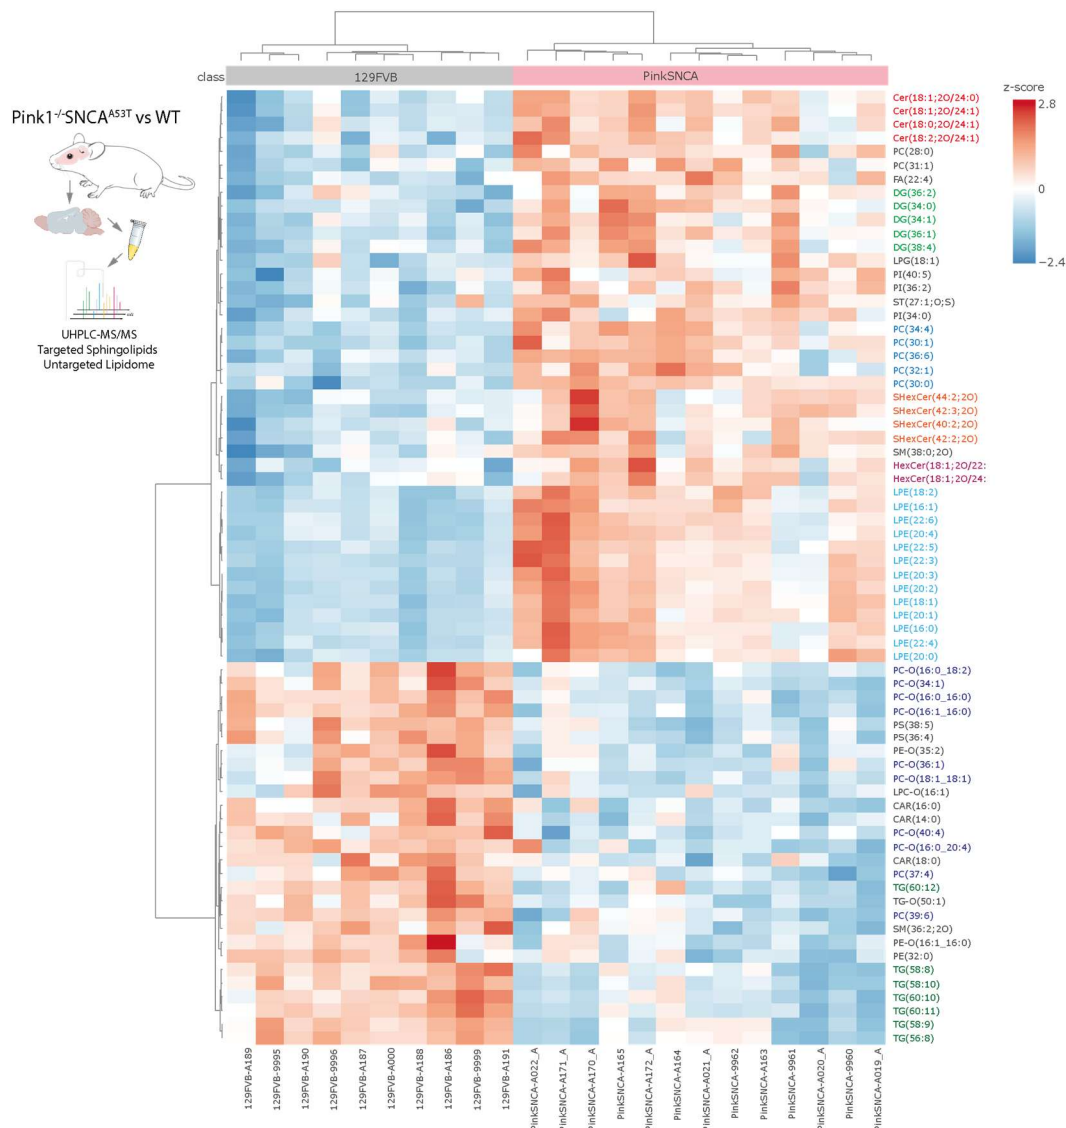

### Supplementary Figure S3

#### Lipidomic UHPLC-MS/MS analysis of mouse brain in Pink1<sup>-/-</sup>SNCA<sup>A53T</sup> mice and WT controls

Heatmap of top 70 regulated lipids in Pink1<sup>-/-</sup>SNCA<sup>A53T</sup> mouse brain versus wildtype controls brain (Sv129-FVB). Brainstem, cerebellum and olfactory bulb were removed and the brain cut sagittal. One half was used for UHPLC-MS/MS lipidomic analysis. Lipid expression values (AUC divided by the AUC of the internal standard; AUC /IS) were square root transformed and auto-scaled to have a common mean and variance of 1 [Z score = (x-  $\bar{x}$ )/SD]. Lipids were clustered according to Euclidean distance metrics using the Ward method. For easier evaluation, lipid species belonging to the same class are depicted in colour. Columns clustered in two clusters according to genotypes. The bottom line shows the IDs of individual mice (n = 10 Sv129FVB controls, n = 13 Pink1<sup>-/-</sup>SNCA<sup>A53T</sup> double mutant PD mice).

Suppl. Fig. 4

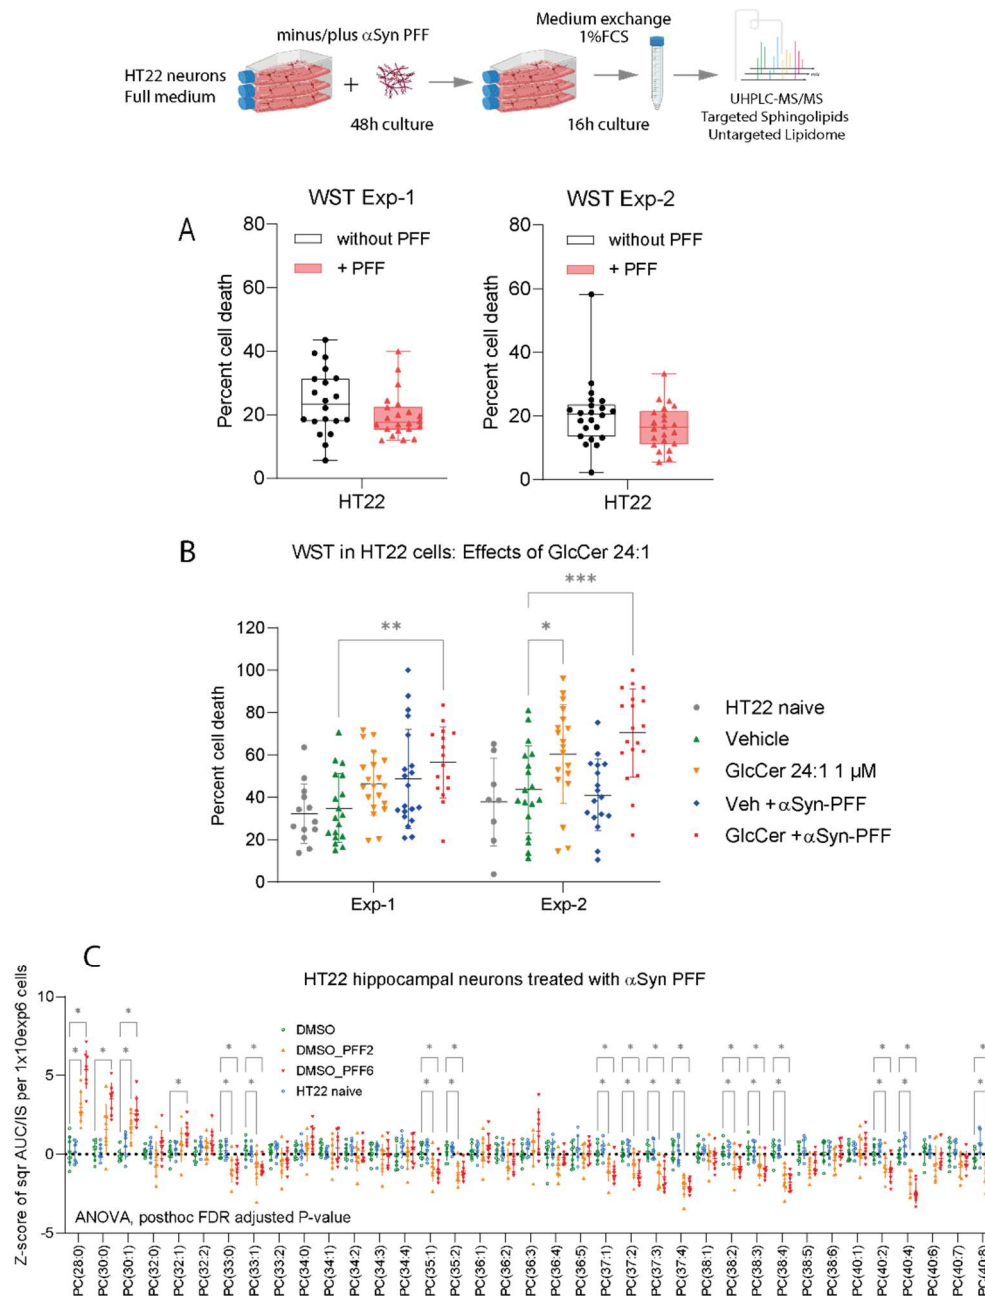

## Supplementary Figure S4

### HT22 mouse hippocampal neurons viability treated with alpha synuclein preformed fibrils (PFF)

**A, B:** HT22 were seeded into 96-well plates in the presence or absence of  $\alpha$ Syn-PFF and GlcCer24:1, and the WST (water soluble tetrazolium) assay was performed 48h after seeding. The decrease of absorbance values was transformed into percentages of cell death. The data in A and B are each from two consecutive independent experiments. Scatters are replicates, the box is the interquartile range, the line is the median, whiskers show minimum to maximum. Errors bars in B are SD.  $\alpha$ Syn-PFF per se had no impact on cell viability, but in combination with GlcCer 24:1 the fraction of cell death was increased.

**C:** Treatment of HT22 with  $\alpha$ Syn-PFF caused a shift of phosphatidylcholine species from long-chain PC to short-chain PC. Z-scores of AUC/IS values were submitted to ANOVA and subsequent posthoc t-tests using an FDR adjustment of alpha. Asterisks show significant discoveries.



Suppl. Fig. 5

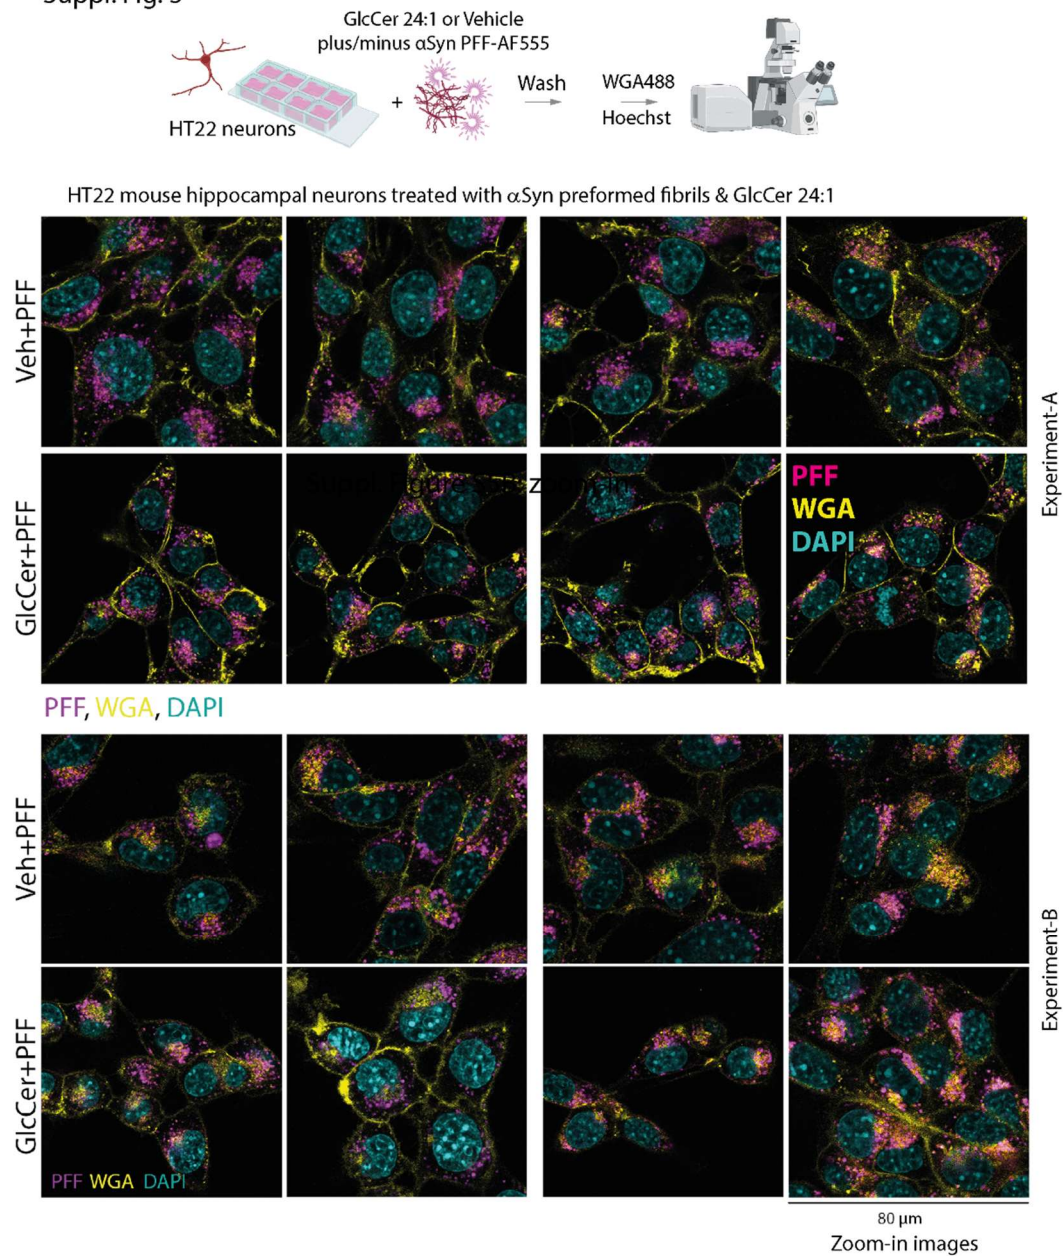

### Supplementary Figure S5

#### Cellular uptake of preformed alpha synuclein fibrils ( $\alpha$ Syn-PFF) in HT22 cells

Corresponding to figure 5 (main body) the images show zoom-in images of the uptake of AF555-labeled  $\alpha$ Syn preformed fibrils in HT22 mouse hippocampal neurons. The images are each 4 examples taken at early and late time points in two independent consecutive replicate experiments. Pretreatment with GlcCer24:1 (1  $\mu$ M) had no significant impact on the PFF-AF555 fluorescence uptake in HT22 cells.



## Suppl. Figure 6

### β-Arrestin assay of candidate GPCR in HEK293 cells

| Fold change versus average of vehicle (0 μM) |        |      |      |      |        |      |      |      |       |      |      |      |       |      |      |      |       |      |      |      |  |  |
|----------------------------------------------|--------|------|------|------|--------|------|------|------|-------|------|------|------|-------|------|------|------|-------|------|------|------|--|--|
| GlcCer18:1                                   | ADORA1 |      |      |      | ADRA2B |      |      |      | CHRM3 |      |      |      | GPR63 |      |      |      | GPR75 |      |      |      |  |  |
| 0 μM                                         | 0.81   | 1.29 | 1.14 | 0.76 | 0.95   | 0.85 | 1.38 | 0.82 | 0.91  | 1.27 | 0.89 | 0.93 | 1     | 0.56 | 1.54 | 0.91 | 0.87  | 0.79 | 1.1  | 1.24 |  |  |
| 1 μM                                         | 2.4    | 1.77 | 2.57 | 0.84 | 0.69   | 0.82 | 0.6  | 0.93 | 0.69  | 0.65 | 1.32 | 2.37 | 0.89  | 0.8  | 1.95 | 1.35 | 1.11  | 0.99 | 0.53 | 0.61 |  |  |
| 5 μM                                         | 1.05   | 1.88 | 0.73 | 1.49 | 1.73   | 0.98 | 0.53 | 0.89 | 0.67  | 3.76 | 0.89 | 0.53 | 1.92  | 0.83 | 1.37 | 0.96 | 0.69  | 0.95 | 1.36 | 1.22 |  |  |
| 10 μM                                        | 0.97   | 1.4  | 1.66 | 0.9  | 0.73   | 1.18 | 1.04 | 0.78 | 0.89  | 1.37 | 0.67 | 0.62 | 0.97  | 0.98 | 1.01 | 0.91 | 0.94  | 0.74 | 1.36 | 0.91 |  |  |

| GlcCer18:1 | HRH1 |      |      |      | HRH4 |      |      |      | LPAR1 |      |      |      | NPBW2 |      |      |      | OXGR1 |      |      |      | P2RY1 |      |      |      |
|------------|------|------|------|------|------|------|------|------|-------|------|------|------|-------|------|------|------|-------|------|------|------|-------|------|------|------|
| 0 μM       | 0.65 | 0.85 | 1.7  | 0.8  | 1.09 | 1.24 | 0.84 | 0.84 | 0.86  | 0.51 | 1.58 | 1.05 | 0.83  | 0.94 | 1.21 | 1.02 | 0.68  | 0.5  | 1.35 | 1.47 | 0.35  | 0.33 | 1.71 | 1.61 |
| 1 μM       | 0.65 | 1    | 2.25 | 1.22 | 2.06 | 1.22 | 0.53 | 1.37 | 1.33  | 0.99 | 1.41 | 0.76 | 1.07  | 1.44 | 6.61 | 2.65 | 0.88  | 0.96 | 1.26 | 1.31 | 1.65  | 1.62 | 1.02 | 1.88 |
| 5 μM       | 0.67 | 0.61 | 1.99 | 2.03 | 2.46 | 1.24 | 0.79 | 2.26 | 0.76  | 0.34 | 2.08 | 0.75 | 1.17  | 1.74 | 2.14 | 1.73 | 0.92  | 0.65 | 1.53 | 1.06 | 0.49  | 0.32 | 1.37 | 1.8  |
| 10 μM      | 1.45 | 0.48 | 0.77 | 0.93 | 4.13 | 1.76 | 1.25 | 1.13 | 1.95  | 0.88 | 0.79 | 0.29 | 2.46  | 1.25 | 1.9  | 2.03 | 1.19  | 0.47 | 1.2  | 0.99 | 1.97  | 1.76 | 0.42 | 0.43 |

| Fold change versus average of vehicle (0 μM) |      |      |      |      |      |      |      |      |        |      |      |      |       |      |      |      |       |      |      |      |       |      |      |      |
|----------------------------------------------|------|------|------|------|------|------|------|------|--------|------|------|------|-------|------|------|------|-------|------|------|------|-------|------|------|------|
| GlcCer24:1                                   | GAL1 |      |      |      | GRM5 |      |      |      | MRGPRF |      |      |      | OPRL1 |      |      |      | SSTR4 |      |      |      | P2RY1 |      |      |      |
| 0 μM                                         | 0.89 | 1.3  | 0.74 | 1.07 | 1.19 | 0.82 | 1.1  | 0.89 | 0.69   | 1.61 | 0.9  | 0.8  | 0.63  | 0.73 | 1    | 1.64 | 0.63  | 1.13 | 1.01 | 1.24 | 0.77  | 0.23 | 1.29 | 1.71 |
| 1 μM                                         | 0.35 | 0.62 | 0.25 | 0.61 | 0.42 | 0.52 | 0.41 | 0.52 | 0.83   | 0.8  | 0.9  | 1.11 | 1.74  | 1.27 | 1.15 | 1.92 | 1.03  | 0.78 | 0.71 | 1.05 | 0.33  | 0.49 | 4.73 | 0.75 |
| 5 μM                                         | 0.39 | 0.67 | 0.37 | 1.19 | 0.7  | 0.55 | 0.61 | 0.94 | 1.54   | 1.49 | 0.76 | 1.37 | 1.71  | 2.22 | 1.27 | 1.64 | 0.55  | 0.95 | 1.8  | 1.1  | 0.34  | 1.2  | 4.5  | 1.98 |
| 10 μM                                        | 0.67 | 1    | 0.75 | 1.02 | 0.72 | 1.19 | 1.41 | 2.1  | 1.75   | 1.63 | 2.41 | 2.13 | 2.81  | 2.83 | 3.08 | 3.96 | 1.38  | 1.83 | 1.19 | 2.58 | 4.36  | 0.25 | 1.29 | 1.94 |

| Positive control - Muscarin receptor stimulation carbachol |                       |      |      |       |      |      |      |               |      |      |      | Positive control - Muscarin receptor stimulation carbachol |                       |      |      |       |      |      |      |               |      |      |      |      |  |  |  |
|------------------------------------------------------------|-----------------------|------|------|-------|------|------|------|---------------|------|------|------|------------------------------------------------------------|-----------------------|------|------|-------|------|------|------|---------------|------|------|------|------|--|--|--|
| CHRM1                                                      |                       |      |      | CHRM5 |      |      |      | Untransfected |      |      |      | CHRM1                                                      |                       |      |      | CHRM5 |      |      |      | Untransfected |      |      |      |      |  |  |  |
| 0 μM                                                       | 0.84                  | 0.84 | 0.72 | 1.59  | 0.92 | 1.02 | 1.13 | 0.92          | 0.92 | 0.87 | 1.32 | 0.89                                                       | 0.7                   | 0.51 | 2.07 | 0.72  | 0.71 | 0.45 | 1.03 | 1.82          | 0.96 | 1.64 | 0.72 | 0.68 |  |  |  |
| 1 μM                                                       | Experiment GlcCer18:1 |      |      |       |      |      |      |               | 0.56 | 0.94 | 0.78 | 0.99                                                       | Experiment GlcCer24:1 |      |      |       |      |      |      |               | 0.32 | 1.28 | 0.56 | 1    |  |  |  |
| 5 μM                                                       |                       |      |      |       |      |      |      |               | 0.73 | 1.2  | 0.8  | 1.48                                                       |                       |      |      |       |      |      |      |               | 0.96 | 0.8  | 1.72 | 1.12 |  |  |  |
| 10 μM                                                      |                       |      |      |       |      |      |      |               | 1.6  | 1.04 | 0.78 | 1.22                                                       |                       |      |      |       |      |      |      |               | 1.6  | 3.6  | 2.04 | 2.56 |  |  |  |
| 100 μM                                                     | 43.6                  | 35.6 | 67.3 | 47.8  | 5.09 | 3.92 | 4.59 | 5.24          |      |      |      |                                                            | 51.8                  | 52.7 | 44.8 | 37.6  | 6.16 | 6.81 | 6.71 | 6.97          |      |      |      |      |  |  |  |

## Supplementary Figure S6

### Replicates analyses of beta arrestin-based GPCR screening assay

GPCR activity was assessed in a heterologous expression model in COS cells stimulated with GlcCer 18:1 versus vehicle or GlcCer 24:1 versus vehicle at 1, 5 and 10 μM. The heatmap shows replicate analyses of GPCR candidates which were selected from an initial screen (330 GPCRs, 8 neg and 4x2 pos controls).
